# Supplementary material for: Effects of Information Visualization on Older Adults’ Decision-Making Performance in a Medicare Plan Selection Task: A Comparative Usability Study
Source: PubMed Central journal article supplement (PMC4909975; doi:10.2196/humanfactors.5106), 2016-06-01
Supplement: humanfactors_v3i1e16_app1.pdf [file humanfactors_v3i1e16_app1.pdf]

APPENDIX A

*Task Analysis for Choosing a Prescription Drug Plan from the Medicare.gov Website*

| <b>Task #</b> | <b>Task</b>                                               | <b>Task/Knowledge Requirements*</b>                              | <b>Feedback</b>      | <b>Potential Problems</b>                                              |
|---------------|-----------------------------------------------------------|------------------------------------------------------------------|----------------------|------------------------------------------------------------------------|
| 1.0           | <b>Observe the table</b>                                  |                                                                  |                      |                                                                        |
| 1.1           | Read each of the headings                                 | Reading comprehension <sup>7</sup>                               | None                 | Does not understand jargon                                             |
| 1.1.1         | Click on "What is this?" if unsure what the heading means | Visual search <sup>8</sup>                                       | Small window appears | Fails to see link                                                      |
| 1.1.2         | Read the definition                                       | Reading comprehension <sup>7</sup>                               | None                 | Does not understand definition                                         |
| 1.1.3         | Press the x button to close the window                    | Declarative knowledge <sup>4</sup>                               | Small window closes  | Unable to figure out how to close window and return to previous window |
| 2.0           | <b>Find total yearly fixed cost</b>                       |                                                                  |                      |                                                                        |
| 2.1           | Locate plan with cheapest monthly premium                 | Visual search <sup>8</sup>                                       | None                 | Forget which plan had the lowest amount                                |
| 2.1.1         | Extract the monthly premium amount                        | Visual search <sup>8</sup>                                       | None                 |                                                                        |
| 2.2           | Multiply premium by 12 months on paper                    | Numerical computation <sup>6</sup> ; Working memory <sup>9</sup> | None                 | May miscalculate amount                                                |
| 2.3           | Locate the annual deductible                              | Visual search <sup>8</sup> ; Working memory <sup>9</sup>         | None                 | Forget which plan to use                                               |
| 2.4           | Add deductible to the premium total                       | Numerical computation <sup>6</sup> ; Working memory <sup>9</sup> | None                 | Forget which value was the premium total                               |
| 3.0           | <b>Calculate out-of-pocket expenses</b>                   |                                                                  |                      |                                                                        |
| 3.1           | List current drug costs                                   | Declarative knowledge <sup>4</sup>                               | None                 | May not remember all costs; may miscalculate amount                    |
| 3.1.2         | Add up the monthly cost of your drugs                     | Numerical computation <sup>6</sup> ;                             | None                 | May miscalculate cost                                                  |

|       |                                                                                                |                                                                      |                      |                                                                          |
|-------|------------------------------------------------------------------------------------------------|----------------------------------------------------------------------|----------------------|--------------------------------------------------------------------------|
|       |                                                                                                | Working memory <sup>9</sup>                                          |                      |                                                                          |
| 3.1.3 | Multiply monthly drug cost by 12 months                                                        | Numerical computation <sup>6</sup> ; Working memory <sup>9</sup>     | None                 | May miscalculate cost; drug costs may differ over the year               |
| 3.2   | Calculate expenses outside of the gap                                                          | Numerical computation <sup>6</sup> ; Working memory <sup>9</sup>     | None                 |                                                                          |
| 3.2.1 | Find the donut hole (gap in coverage) amount                                                   | Abstract reasoning <sup>1</sup> ; Reading comprehension <sup>7</sup> | None                 | May not understand jargon or meaning                                     |
| 3.2.2 | Click on the "what is this?" link in the "coverage in the gap" column                          | Reading comprehension <sup>7</sup>                                   | Small window appears | Fails to see link; may not understand jargon                             |
| 3.2.3 | Read explanation                                                                               | Reading comprehension <sup>7</sup>                                   | None                 | May not understand explanation                                           |
| 3.2.4 | Extract the donut hole amount                                                                  | Visual search <sup>8</sup>                                           | None                 | May not identify correct #                                               |
| 3.2.5 | Subtract total yearly drug cost from the donut hole amount                                     | Numerical computation <sup>6</sup> ; Working memory <sup>9</sup>     | None                 | Forget which amount was the total yearly drug cost                       |
| 3.2.6 | Divide that number by monthly cost of drugs to determine months of no coverage                 | Numerical computation <sup>6</sup> ; Working memory <sup>9</sup>     | None                 | Forget the monthly cost of drugs; May not understand how to do this task |
| 3.2.7 | Round that number up                                                                           | Abstract reasoning <sup>1</sup>                                      | None                 |                                                                          |
| 3.2.8 | Multiply number of months without coverage by monthly cost of drugs (cost w/o using insurance) | Numerical computation <sup>6</sup> ; Working memory <sup>9</sup>     | None                 | Forget the monthly cost or calculated number of months without coverage  |
| 3.2.9 | Add this to number 3.1.3                                                                       | Numerical computation <sup>6</sup> ; Working memory <sup>9</sup>     | None                 | May forget the monthly drug cost before the donut hole                   |
| 3.3   | Calculate drug sharing costs                                                                   |                                                                      | None                 | May not understand jargon                                                |

|       |                                                                             |                                                                                                      |                                  |                                                                                                           |
|-------|-----------------------------------------------------------------------------|------------------------------------------------------------------------------------------------------|----------------------------------|-----------------------------------------------------------------------------------------------------------|
| 3.3.1 | Click on the plan name to get to the detail page                            | Good visual acuity <sup>5</sup> ; Attentional control <sup>2</sup> ; Abstract reasoning <sup>1</sup> | Web page displays plan details   | Fails to see or understand link                                                                           |
| 3.3.2 | Scroll down to find the drug cost sharing box                               | Visual search <sup>8</sup>                                                                           | Page moves with scrolling action | Fails to scroll to see more details                                                                       |
| 3.3.3 | Read tier cost information                                                  | Reading comprehension <sup>7</sup>                                                                   | None                             | May not understand jargon                                                                                 |
| 3.3.4 | Contact the drug plan to find out what tier your drugs are in (recommended) | Declarative knowledge <sup>4</sup>                                                                   | Speak to representative          | Unable to do this task independently                                                                      |
| 3.3.5 | Calculate cost of drugs by multiplying the tier cost by number of drugs     | Numerical computation <sup>6</sup> ; Working memory <sup>9</sup>                                     | None                             | Forget which drugs are in what tier or how much each tier was worth; Forget which plan is being evaluated |
| 3.3.6 | Add up totals                                                               | Numerical computation <sup>6</sup> ; Working memory <sup>9</sup>                                     | None                             | May miscalculate totals; Forget to add in a total                                                         |
| 3.3.7 | Add this number from 3.2.9                                                  | Numerical computation <sup>6</sup> ; Working memory <sup>9</sup>                                     | None                             | Forget amount from 3.2.9                                                                                  |
| 4.0   | <b>Consider customer satisfaction ratings</b>                               |                                                                                                      |                                  |                                                                                                           |
| 4.1   | Find the column for summary ratings                                         | Visual search <sup>8</sup>                                                                           | None                             |                                                                                                           |
| 4.1.1 | Extract summary rating                                                      | Visual search <sup>8</sup>                                                                           | None                             |                                                                                                           |
| 4.1.2 | Click on the plan name to get to the detail page                            | Abstract reasoning <sup>1</sup> ; Good visual acuity <sup>5</sup>                                    | Web page displays plan details   | Fail to realize detailed information exists                                                               |
| 4.1.3 | Find the box that contains all of the rating categories                     | Visual search <sup>8</sup>                                                                           | None                             | Fail to scroll down                                                                                       |
| 4.1.4 | Read the label and definition of each rating category                       | Reading comprehension <sup>7</sup>                                                                   | None                             | May not understand jargon                                                                                 |
| 4.1.5 | Compare the                                                                 | Comparison <sup>3</sup> ,                                                                            | None                             | May not                                                                                                   |

|            |                                                               |                                                       |      |                                              |
|------------|---------------------------------------------------------------|-------------------------------------------------------|------|----------------------------------------------|
|            | number of stars for each category                             | Working memory <sup>9</sup>                           |      | understand stars                             |
| 5.0        | <b>Compare yearly cost and monthly cost to current budget</b> | Comparison <sup>3</sup> , Working memory <sup>9</sup> | None | May forget monthly or yearly totals          |
| 6.0        | <b>Repeat steps 2.0-4.1.2 for another plan</b>                |                                                       | None | May forget comparable values from prior plan |
| 7.0        | <b>Compare plan to another plan</b>                           |                                                       |      | May forget comparable values from prior plan |
| 7.1        | Compare yearly fixed cost                                     | Comparison <sup>3</sup> , Working memory              | None | May forget comparable values from prior plan |
| 7.2        | Compare out-of-pocket expenses                                | Comparison, Working memory <sup>9</sup>               | None | May forget comparable values from prior plan |
| 7.3        | Compare nationwide coverage                                   | Comparison <sup>3</sup> , Working memory <sup>9</sup> | None | May forget comparable values from prior plan |
| 7.4        | Compare satisfaction ratings                                  | Comparison <sup>3</sup> , Working memory <sup>9</sup> | None | May forget comparable values from prior plan |
| <b>8.0</b> | <b>Repeat steps 2.0-7.4 for another plan</b>                  |                                                       | None | May forget comparable values from prior plan |
| <b>9.0</b> | <b>Compare against all plans</b>                              |                                                       | None | May forget comparable values from prior plan |

NOTE: \*Definitions for task/knowledge requirements:

<sup>1</sup>*Abstract reasoning*: Process of perceiving issues and reaching conclusions through the use of symbols or generalizations rather than concrete, factual information

<sup>2</sup>*Attentional control*: Controlled processing on difficult tasks or tasks that use unfamiliar items.

<sup>3</sup>*Comparison*: Examination of 2 or more items to establish similarities and differences.

<sup>4</sup>*Declarative knowledge*: Knowledge about facts or things.

<sup>5</sup>*Good visual acuity*: Clarity or sharpness of vision, the ability to see fine detail (e.g., reading test, recognizing symbols).

<sup>6</sup>*Numerical computation*: Ability to solve mathematical equations.

<sup>7</sup>*Reading comprehension*: Ability to understand what is read.

<sup>8</sup>*Visual search*: Ability to actively scan the visual environment for a particular object or feature (target) among other objects or features.

<sup>9</sup>*Working memory*: Brief, immediate memory for material that is currently being processed; a portion of working memory also coordinates ongoing mental activities.
